# Supplementary material for: Adherence to hepatitis A and hepatitis B multi-dose vaccination schedules among adults in the United Kingdom: a retrospective cohort study
Source: Springer Nature journal article supplement (doi:10.1186/s12889-019-6693-5), 2019-04-15

**Figure S1.** Identification of eligible adults  $\geq 19$  years old initiating hepatitis A, hepatitis B, or hepatitis A/B vaccination series in the Clinical Practice Research Datalink (CPRD).

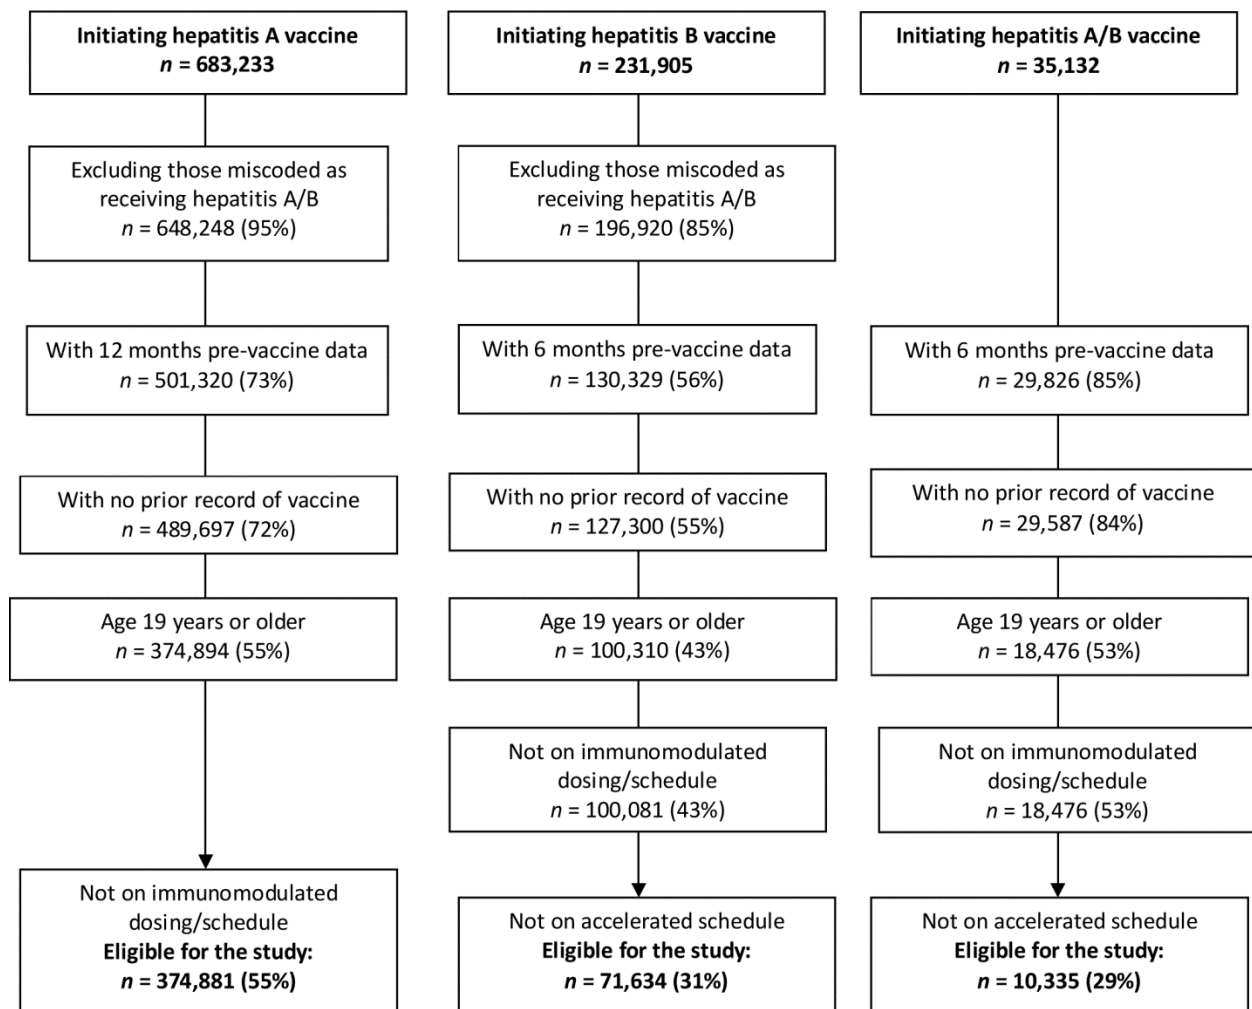

Supplement: MOESM1 [file 16657440]
